# Supplementary material for: A Composite Hydrogel with High Mechanical Strength, Fluorescence, and Degradable Behavior for Bone Tissue Engineering
Source: PubMed Central journal article supplement (PMC6680580; doi:10.3390/polym11071112), 2019-07-01
Supplement: polymers-11-01112-s001.pdf [file polymers-11-01112-s001.pdf]

# Supporting information

## A Composite Hydrogel with High Mechanical Strength, Fluorescence, and Degradable Behavior for Bone Tissue Engineering

Yanqin Wang <sup>1,2,3\*</sup>, Yanan Xue <sup>1,4</sup>, Jinghui Wang <sup>1</sup>, Yaping Zhu <sup>1</sup>, Yu Zhu <sup>1</sup>, Xuehui Zhang <sup>1</sup>, Jingwen Liao <sup>1</sup>, Xiaona Li <sup>1</sup>, Xiaogang Wu <sup>1</sup>, Yi-Xian Qin <sup>5</sup> and Weiyi Chen <sup>1\*</sup>

<sup>1</sup> College of biomedical engineering, Taiyuan University of Technology, Taiyuan 030024, China; xueyanan5200@163.com (Y.X.); wangjinghui0783@link.tyut.edu.cn (J.W.); zhuyaping0928@link.tyut.edu.cn (Y.Z.); zhuyu0781@link.tyut.edu.cn (Y.Z.); zhangxuehui6983@link.tyut.edu.cn (X.Z.); ljwtyut@126.com (J.L.); lixiaona@tyut.edu.cn (X.L.); wuxiaogang@tyut.edu.cn (X.W.); yi-xian.qin@stonybrook.edu (Y.Q.)

<sup>2</sup> State Key Laboratory of Luminescent Materials and Devices, South China University of Technology, Guangzhou 510640, China

<sup>3</sup> State Key Laboratory of Molecular Engineering of Polymers, Fudan University, Shanghai 200433, China

<sup>4</sup> Sixth Academy of China Aerospace Science & Industry Corporation, Hohhot 010010, China

<sup>5</sup> Department of Biomedical Engineering, State University of New York at Stony Brook, New York, NY 11794, USA

\* Correspondence: wangyanqin@tyut.edu.cn (Y.W.); chenweiyi@tyut.edu.cn (W.C.); Tel.: +86-351-3176655 (Y.W.); Fax: +86-22-23502458 (Y.W.)

Table 1. The mechanical properties of the CDs/HA/PVA SN hydrogels with various proportions.

| Samples                                    | Mass ratios of CDs to PVA (wt%) | Mass ratios of HA to PVA | Young's modulus (kPa) | Compression strength at a maximum strain of 85% (kPa) |
|--------------------------------------------|---------------------------------|--------------------------|-----------------------|-------------------------------------------------------|
| CDs <sub>0.0</sub> /HA <sub>0.6</sub> /PVA | 0.0                             | 0.6                      | 0.43±0.028            | 390.0±101.56                                          |
| CDs <sub>1.5</sub> /HA <sub>0.6</sub> /PVA | 1.5                             | 0.6                      | 0.62±0.025            | 470.2±36.26                                           |
| CDs <sub>3.0</sub> /HA <sub>0.6</sub> /PVA | 3.0                             | 0.6                      | 0.81±0.058            | 710.6±74.74                                           |
| CDs <sub>4.5</sub> /HA <sub>0.6</sub> /PVA | 4.5                             | 0.6                      | 0.18±0.031            | 220.7±102.31                                          |
| CDs <sub>6.0</sub> /HA <sub>0.6</sub> /PVA | 6.0                             | 0.6                      | 0.15±0.018            | 150.5±52.38                                           |
| CDs <sub>3.0</sub> /HA <sub>0.0</sub> /PVA | 3.0                             | 0.0                      | 0.43±0.043            | 435.7±8.13                                            |
| CDs <sub>3.0</sub> /HA <sub>0.2</sub> /PVA | 3.0                             | 0.2                      | 0.52±0.038            | 570.8±162.44                                          |
| CDs <sub>3.0</sub> /HA <sub>0.4</sub> /PVA | 3.0                             | 0.4                      | 0.32±0.006            | 610.7±44.60                                           |
| CDs <sub>3.0</sub> /HA <sub>0.6</sub> /PVA | 3.0                             | 0.6                      | 0.26±0.016            | 409.4±239.70                                          |
| CDs <sub>3.0</sub> /HA <sub>0.8</sub> /PVA | 3.0                             | 0.8                      | 0.25±0.017            | 330.6±64.54                                           |

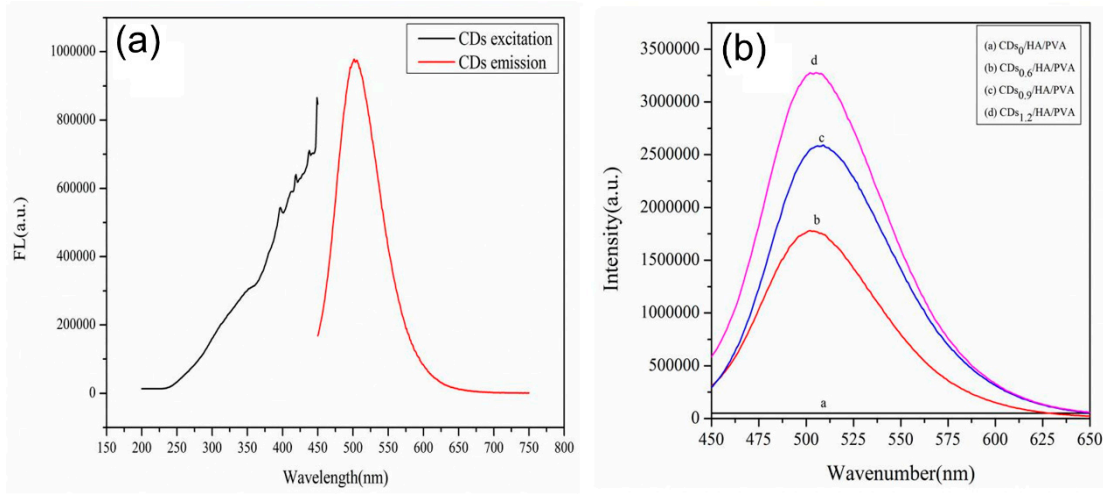

Figure S1. (a) the fluorescence excitation and emission spectroscopy of the as-prepared CDs and (b) fluorescence emission spectroscopy of the CDs/HA<sub>0.6</sub>/PVA SN hydrogels with mass ratios of CDs to PVA at 0.0%, 0.6%, 0.9% and 1.2%, respectively ( $\lambda_{\text{exc}}=300 \text{ nm}$ ).
